# Supplementary material for: The reciprocal regulation loop of Notch2 pathway and miR-23b in controlling gastric carcinogenesis
Source: PubMed Central journal article supplement (PMC4627232; doi:10.18632/oncotarget.4000), 2015-05-18
Supplement: oncotarget-06-18012-s001.pdf [file oncotarget-06-18012-s001.pdf]

## SUPPLEMENTARY FIGURES AND TABLE

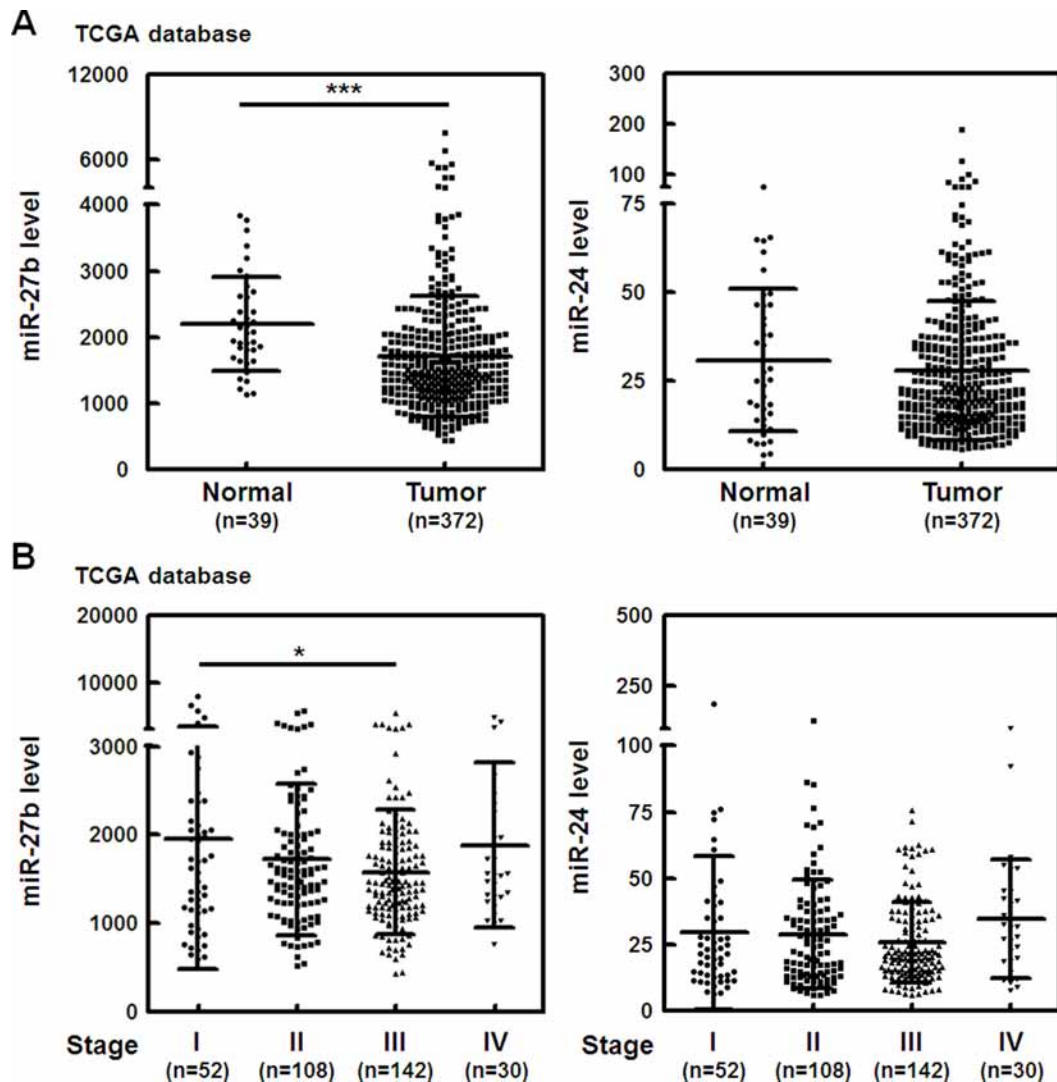

**Supplementary Figure S1: Levels of miR-27b but not miR-24 are down-regulated in stomach adenocarcinoma samples.** **A.** As described in the legend to Figure 1, level 3 data of miR-27b (*left*) and miR-24 (*right*) expressions from stomach adenocarcinoma samples ( $n = 372$ ) and normal tissue samples ( $n = 39$ ) were downloaded from the TCGA and Broad GDAC Firehose data portal and then analyzed for comparing abundances by GraphPad Prism 5 software.  $***P < 0.001$ . **B.** As described above, miR-27b (*left*) and miR-24 (*right*) levels in stomach adenocarcinoma samples were downloaded and then divided according to the stage classification.  $*P < 0.05$ . Data are shown as mean  $\pm$  standard deviation.

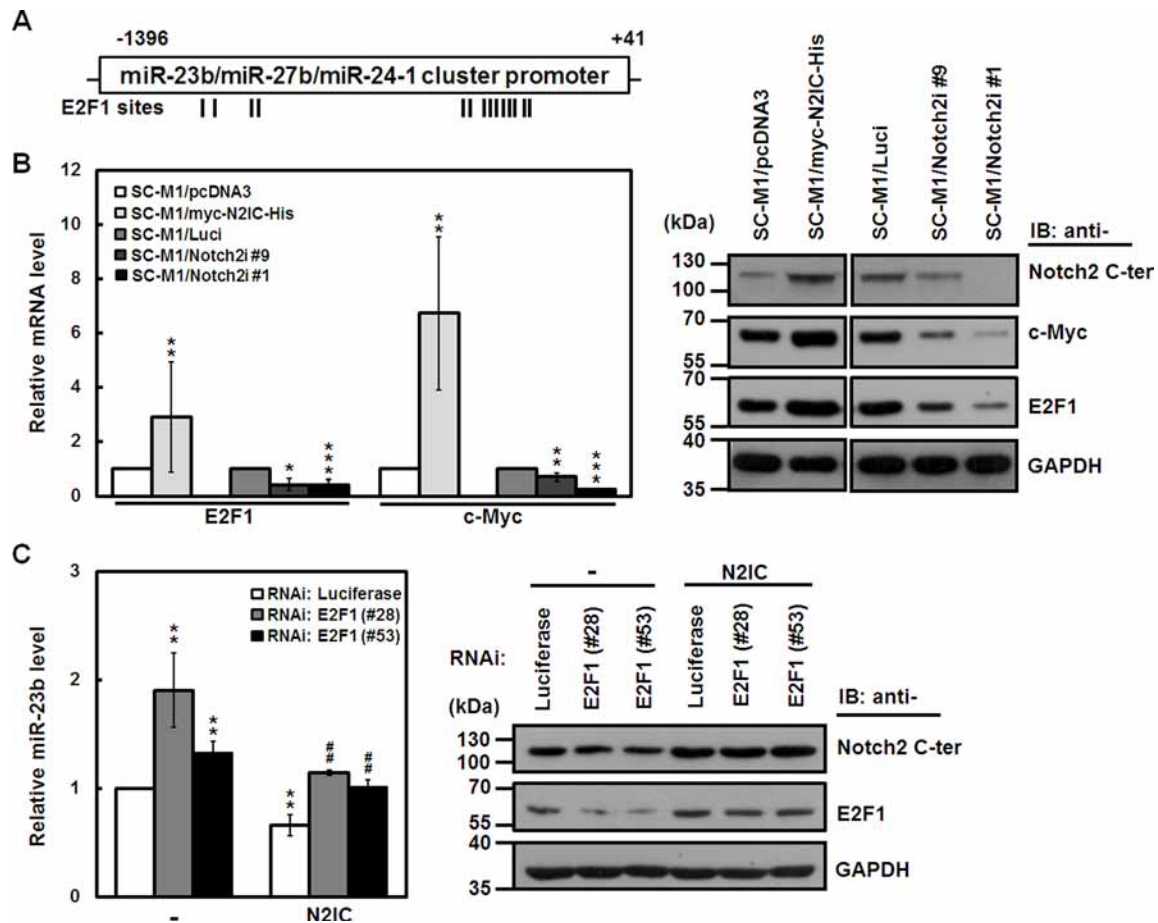

**Supplementary Figure S2: N2IC down-regulates miR-23b through inducing E2F1.** **A.** Schematic representation of human miR-23b-27b-24-1 promoter. Black lines represent the 14 putative E2F1-binding sites in this promoter. **B.** The transcript levels of E2F1 and c-Myc in SC-M1/myc-N2IC-His cells, SC-M1/Notch2i cells (#1 and #9), and their control cells (SC-M1/pcDNA3 cells and SC-M1/Luciferase cells, respectively) were measured by quantitative real-time PCR (*left*). The data were compared, after being normalized to GAPDH. The levels of E2F1 and c-Myc mRNAs in control cells were set to unity. Means of three independent experiments performed at least in triplicate are shown. \* $P < 0.05$ ; \*\* $P < 0.01$ ; \*\*\* $P < 0.001$ . Whole-cell extracts of these cells were also analyzed by Western blot analysis using anti-Notch2 C-terminal (C-ter), anti-c-Myc, anti-E2F1, and anti-GAPDH antibodies (*right*). **C.** The relative miR-23b levels were determined by miRNA quantitative real-time PCR after co-transfection with N2IC-expressing construct pcDNA-myc-N2IC-His (N2IC) or its control vector pcDNA3.1-myc-His (-) and siRNA vectors against E2F1 (#28 and #53) or luciferase into SC-M1 cells (*left*). The level of miR-23b in SC-M1 cells transfected with siRNA vector against luciferase was set to unity. Means of three independent experiments performed at least in triplicate are shown. \*\* $P < 0.01$ . ### $P < 0.01$ . Data are shown as mean  $\pm$  standard deviation. Whole-cell extracts of these cells were also analyzed by Western blot analysis using anti-Notch2 C-terminal (C-ter), anti-E2F1, and anti-GAPDH antibodies (*right*).

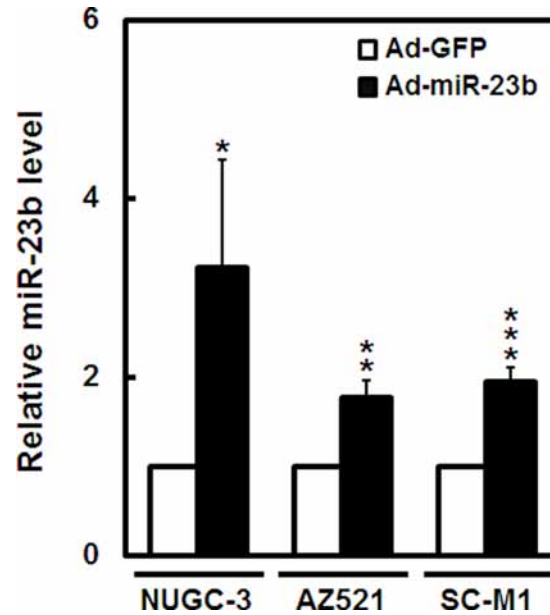

**Supplementary Figure S3: Establishment of miR-23b-expressing adenoviral system in NUGC-3, AZ521, and SC-M1 gastric cancer cells.** NUGC-3, AZ521, and SC-M1 cells were infected with adenoviruses expressing miR-23b (Ad-miR-23b) or GFP (Ad-GFP) for 48 hours. Then the relative levels of miR-23b were determined using miRNA quantitative real-time PCR. The levels of miR-23b in the cells infected with adenoviruses expressing GFP were set to unity. \* $P < 0.05$ ; \*\* $P < 0.01$ ; \*\*\* $P < 0.001$ . Data are shown as mean  $\pm$  standard deviation.

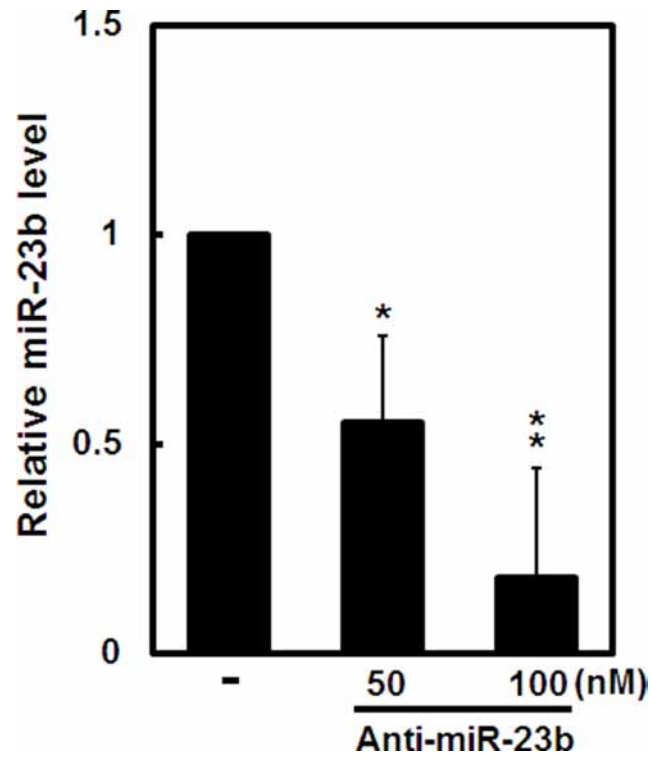

**Supplementary Figure S4: Knockdown of miR-23b in SC-M1 cells after transfection with antagomir-23b.** SC-M1 cells were transfected with 50 or 100 nM antagomir-23b (anti-miR-23b) or scrambled control (-) for 48 hours. The levels of miR-23b in the transfected cells were measured by miRNA quantitative real-time PCR. \* $P < 0.05$ ; \*\* $P < 0.01$ . Data are shown as mean  $\pm$  standard deviation.

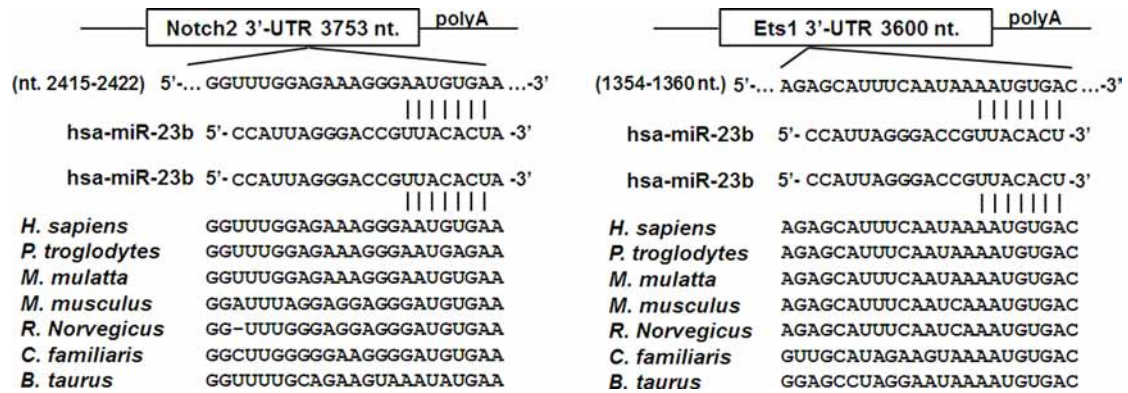

**Supplementary Figure S5: The putative miR-23b-binding sites in Notch2 receptor and Ets1 3'-UTRs.** There are putative miR-23b-binding sites located at nucleotide 2415 to 2422 from the start of Notch2 receptor 3'-UTR (*left*) and at nucleotide 1354 to 1360 from the start of Ets1 3'-UTR (*right*). The sequences of miR-23b are aligned with the 3'-UTRs of Notch2 receptor and Ets1 in human (*H. sapiens*), chimpanzee (*P. troglodytes*), monkey (*M. mulatta*), mouse (*M. musculus*), rat (*R. norvegicus*), dog (*C. familiaris*), and cow (*B. taurus*).

**Supplementary Table S1. Sequence of primers for siRNA, PCR, and real-time PCR**

| Assays        |               | Sequence (5' to 3')                                       | Amplicon (bp) |
|---------------|---------------|-----------------------------------------------------------|---------------|
| siRNA         | E2F1 (#28)    | CTACTCAGCCTGGAGCAAGAA                                     |               |
|               | E2F1 (#53)    | ACCTCTTCGACTGTGACTTTG                                     |               |
|               | Ets1 (#917)   | ATCCCGCTATACCTCGGATTA                                     |               |
|               | Ets1 (#918)   | GACCGTGCTGACCTCAATAAG                                     |               |
| PCR           | Notch2 3'-UTR | F TCTAGATCTTTTTCTTGGACTAC<br>R TCTAGATCTCAACAAAACATTAC    | 566           |
|               | Ets1 3'-UTR   | F AATTGCTCGAGTGGCACTGAAG<br>R CTAGCGGCCGCCTCTCCAGCAA      | 3,519         |
|               | miR-23b       | F ATAAGATCTCCACCTCTTTGCTAG<br>R AACTCGAGCATCTTCCTCAGCTG   | 301           |
| real-time PCR | CD44          | F TCCAACACCTCCCAGTATGACA<br>R GGCAGGTCTGTGACTGATGTACA     | 83            |
|               | Nanog         | F CCTGTGATTTGTGGGCCTG<br>R GACAGTCTCCGTGTGAGGCAT          | 78            |
|               | Oct4          | F GGTGGAGGAAGCTGACAACAA<br>R AAATTCTCCAGGTTGCCTCTCA       | 123           |
|               | SOX-2         | F GTATCAGGAGTTGTCAAGGCAGAG<br>R TCCTAGTCTTAAAGAGGCAGCAAAC | 78            |
|               | E2F1          | F AGCTGGACCACCTGATGAAT<br>R GTCCTGACACGTCACGTAGG          | 95            |
|               | Ets1          | F TCACTAAAGAACAGCAACGA<br>R ATTCACAGCCCACATCAC            | 92            |
|               | Notch2        | F GTGAGGGAGACATCAACGAG<br>R GTAAAGGCACTACGGCAAAC          | 109           |
|               | GAPDH         | F AAATCCCATCACCATCTTCC<br>R TCACACCCATGACGAACA            | 194           |
